# Supplementary material for: Slowing of the Time Course of Acidification Decreases the Acid-Sensing Ion Channel 1a Current Amplitude and Modulates Action Potential Firing in Neurons
Source: Front Cell Neurosci. 2020 Feb 28;14:41. doi: 10.3389/fncel.2020.00041 (PMC7059123; doi:10.3389/fncel.2020.00041)
Supplement: Supplementary file 1 [file Table_1.XLSX]

## Sheet: Fig. 1D
Titel:	time course of SSD
units in s-1!
7.2																7.2
dt5[s]	hA1a-5	hA1a-9		hA1a-11		hA1a-1	hA1a-5	hA1a-6	hA1a-8	hA1a-E1	hA1a-E2	hA1a-E3	hA1a-E4			dt5[s]
1	0.94592	0.91573		0.9178		0.91579	0.85928	0.84226	1.0501	1.1384	0.93849	1.0177	0.98875			1	0.957293	0.0862457	11
2	0.89759	0.96031		0.83563		1.0138	0.91123	1.0233	0.9963	0.93608	1.0066	0.98329	0.95875			2	0.956625	0.0575526	11
4	0.87923	0.99702		0.96942		1.1931	0.89951	0.96476	0.99405	0.8464	0.98072	0.9804	0.94593			4	0.968231	0.0896454	11
8	0.92318	0.9311		1.0236		0.93328	0.88591	0.92815	1.002	0.79745	0.9721	0.95777	0.93783			8	0.93567	0.0598093	11
16	0.84292	0.90108		0.95951		0.88304	0.97413	0.90394	0.96453	0.86481	0.91922	0.93793	0.88064			16	0.911977	0.0431353	11
32	0.69587	0.88555		0.84727		0.93969	0.85865	0.92302	0.95075	0.77254	0.79437	0.86431				32	0.853202	0.0801567	10
64	0.64096	0.87787		0.70054		0.85026			0.88699	0.67438	0.59911	0.77133				64	0.75018	0.112406	8
128		0.79179				0.79673				0.56381	0.53302	0.71603				128	0.680276	0.125024	5
K	0.02211	0.006352				0.02027		0.01735	0.01672	0.02853	0.0157	0.01892				K	0.018244	0.00628289	8	s-1
7.1
dt5[s]	hA1a-5	hA1a-6	hA1a-7	hA1a-11		hA1a-8	hA1a-2
1	0.88599	1.0627	0.88031	0.99679		1.0546	1.0063									1	0.981115	0.080183	6
2	0.87071	1.0376	0.94056	0.93214		0.99969	0.93447									2	0.952528	0.0583792	6
4	0.85653	0.90341	0.95764	1.0216		0.93081	0.88749									4	0.926247	0.0582797	6
8	0.83717	0.76757	0.94153	0.7745		0.87213	0.74642									8	0.82322	0.0747701	6
16	0.60507	0.62311	0.96701	0.52639		0.74817	0.50651									16	0.66271	0.171915	6
32	0.38132		0.77782	0.28255		0.66224	0.26554									32	0.473894	0.232615	5
64	0.12979		0.42819	0.18944		0.47416	0.11223									64	0.266762	0.171532	5
128			0.11545			0.091383	0.054352										0.0870617	0.0307774	3
K	0.02724		0.01144	0.05159		0.01448	0.04799									K	0.030548	0.0185824	5	s-1
7
dt5[s]	hA1a-1	hA1a-2	hA1a-3	hA1a-4	hA1a-5	hA1a-8
1	0.88662	0.76872	0.93291	0.96115	0.9968	0.9688										1	0.919167	0.0826261	6
2	0.89972	0.89889	0.9068	0.92183	0.8518	0.90135										2	0.896732	0.0236011	6
4	0.80781	0.7494	0.74922	0.72218	0.76239	0.794										4	0.764167	0.0316299	6
8	0.60034	0.66959	0.43366	0.4404	0.51118	0.63618										8	0.548558	0.101296	6
16	0.34334		0.21373	0.15867	0.18803											16	0.225942	0.0814335	4
32	0.10143			0.023062	0.023343											32	0.0492783	0.0451649	3
128	0.014212					0.081926										128	0.048069	0.047881	2
K	0.06516	0.02979	0.09855	0.1106	0.1013	0.06744										K	0.0788067	0.0304126	6	s-1
6.9
	hA1a-E2	hA1a-E3	hA1a-E4	hA1a-E5	hA1a-E6
dt5[s]	b/a
1	0.76613	0.64569	0.77712	0.59243												1	0.695342	0.0908383	4
2	0.57871	0.44314	0.48055	0.42298												2	0.481345	0.0691536	4
4	0.30068	0.23031	0.24652	0.14219												4	0.229925	0.0657755	4
8	0.10993	0.052489	0.054641	0.039												8	0.064015	0.0313829	4
16	0.073908	0.014024	0.014263	0.024475												16	0.0316675	0.0285786	4
32	0.0074494	0.0081811	0.0070953													32	0.00757527	0.000553735	3
64	0.011356			0.010825												64	0.0110905	0.000375474	2
128
K	0.3179	0.3628	0.4196	0.4482												K	0.387125	0.0582197	4	s-1
6.8
dt5[s]
1	0.54448	0.51197	0.52034	0.54062	0.58366	0.54099										1	0.540343	0.0248963	6
2	0.24132	0.21753	0.19202	0.27795	0.30536	0.29355										2	0.254622	0.0449571	6
4	0.056726	0.066883	0.042634	0.081613	0.095642	0.088782										4	0.0720467	0.0202722	6
8	0.0031624	0.01506	0.0072398	0.018369	0.023968	0.01989										8	0.0146149	0.00793915	6
16			0.0075875	0.016012	0.013625	0.0077044										16	0.0112322	0.00425446	4
32					0	0										32	0	0	2
64
K	0.8097	0.8861	1.012	0.6927	0.6669	0.6303										K	0.78295	0.147468	6	s-1
128
6.7
dt5[s]
1	0.52038	0.5488	0.6619	0.52551	0.34172											1	0.519662	0.114868	5
2	0.069904	0.114	0.10564		0.053784											2	0.085832	0.0286738	4
4	0.092428	0.014778	0.011675		0.010602											4	0.0323708	0.0400773	4
8		0.0046493	0.0025038													8	0.00357655	0.0015171	2
16
32
64
128
K	2.973	1.622	1.88		1.919											K	2.0985	0.597708	4	s-1

## Sheet: Fig. 1E
Titel:	time course recovery
	whole-cell
7.2
dt5[s]	hA1a-4	hA1a-4	hA1a-1	hA1a-2	hA1a-1 (ds pH dep inac fichier)	hA1a-2			hA1a-1	hA1a-2	hA1a-3	hA1a-6	hA1a-E1	hA1a-E2	hA1a-E3	hA1a-E4			dt5[s]	#DIV/0!	#DIV/0!	0
1	0.036312	0	0.003607	0.0011153	0.0015605	0.0015123			0.0096638	0.0029802	0.0011453		0.024075	0.0104688	0.0116903	0.0634135			1	0.012888	0.0185494	13
2	0.27693	0.0086644	0.0065496	0.0032657	0.0071737	0.0081103			0.024171	0.0097634	0.0011921		0.0480121	0.0243735	0.0187681	0.0946897			2	0.0408972	0.0753277	13
4		0.022297	0.026574	0.019499	0.029014	0.022942			0.038447	0.015488	0.0016233		0.0110329	0.0261597	0.0336618	0.127083			4	0.0311518	0.0317897	12
8		0.055945	0.069519	0.050635	0.067426	0.064431			0.058903	0.025154	0.0024783		0.0355932	0.0572523	0.0632902	0.204861			8	0.0629573	0.0488854	12
16		0.15171	0.1354	0.11877	0.13289	0.13141			0.098541		0.0037829	0.072429	0.0545587	0.126049	0.108366	0.318367			16	0.121023	0.07481	12
32		0.25863	0.16881	0.18996	0.19631	0.25136			0.17472		0.01645	0.11561	0.121302	0.173305	0.183156	0.438481			32	0.190674	0.10074	12
64		0.50862	0.24472	0.29434	0.29421	0.39857			0.30679		0.15816	0.25193	0.17587	0.29034	0.279743	0.573818			64	0.314759	0.123255	12
128		0.58794	0.29347	0.40546	0.33902	0.59536			0.43953			0.96101	0.226758	0.408815	0.419074				128	0.467644	0.208054	10
K		0.01932	0.03168	0.01789	0.02887	0.01282			0.01141				0.01515	0.01432	0.0125	0.03831			K	0.020227	0.0093816	10	s-1
	whole-cell
7.25
dt5[s]			hA1a-1	hA1a-2	hA1a-1 (ds pH dep inac fichier)	hA1a-2			hA1a-4	hA1a-4	hA1a-5	hA1a-6
1	0.016194		0.0092364	0.0020571	0.0025622				0.0067123	0.0089109									1	0.00761215	0.00519891	6
2	0.027378		0.0074316	0.0041663	0.013399	0.01385			0.028291	0.030306	0.0026941								2	0.0159395	0.0112571	8
4	0.10102		0.03131	0.053813	0.065231	0.070371			0.070755	0.07262	0.017932								4	0.0603815	0.0259737	8
8	0.31763		0.11314	0.16067	0.16683	0.16902				0.12799	0.0050151								8	0.151471	0.0928325	7
16	0.59678		0.28241	0.34759	0.33121	0.33358				0.19424	0.011451								16	0.299609	0.176635	7
32	0.7725		0.41821	0.56273	0.48182	0.55794				0.65761	0.31953								32	0.53862	0.150299	7
64	0.85042		0.5992	0.73456	0.62624	0.73543					0.75347								64	0.716553	0.0915336	6
128	0.85549		0.78659	0.86083	0.75142	0.85251				0.63498	0.77315								128	0.787853	0.0806187	7
K	0.07302		0.02332	0.03375	0.03496	0.03356				0.04507	0.01814								K	0.0374029	0.0179389	7	s-1
	whole-cell
7.3																					#DIV/0!
dt5[s]		hA1a-1	hA1a-2	hA1a-3	hA1a-1	hA1a-2	hA1a-1 (ds pH dep inac fichier)	hA1a-2	hA1a-1	hA1a-4	hA1a-6
1	0	0	0.016503	0.0093995	0.0062871	-0.0015898	0.0028973		0.087738	0.0024512	0.010315								1	0.0134001	0.0267205	10
2	0.076341	0.023139	0.1084	0.055589	0.0077779	0.0054188	0.047661	0.011825	0.2457	0.0023428	0.01293								2	0.054284	0.0719945	11
4	0.24141	0.07407	0.31209	0.18103	0.046116	0.063125	0.15448	0.036209	0.36798		0.015143								4	0.149165	0.123989	10
8	0.45855	0.2261	0.59195	0.38992	0.132	0.22086	0.31792	0.098226	0.54734	0.01122	0.0070027								8	0.272826	0.205362	11
16	0.69665	0.49831	0.81499	0.69997	0.3124	0.50176	0.54405	0.31803	0.74626	0.16493	0.040186								16	0.485231	0.251013	11
32	0.99102	0.71042	0.89156	0.82844	0.52181	0.73648	0.7156	0.70719	0.86288	0.43344	0.46487								32	0.714883	0.179389	11
64		0.93697		0.95026	0.79379	0.87563	0.84805	0.902	0.89902	0.7013	0.64501								64	0.839114	0.105835	9
128	0.71496	0.99685		0.95955	0.94548	0.96846	0.89962	0.93832	1.1155	0.87217									128	0.934546	0.107159	9
K	0.1222	0.04249	0.1462	0.07935	0.02504	0.04762	0.06053	0.03716	0.08469	0.01858	0.006898								K	0.060978	0.043603	11	s-1
	whole-cell
7.4
dt5[s]	hA1a-3	hA1a-1
1	0.036312	0.048727							0.0054887	0.048727									1	0.0348137	0.0204072	4
2	0.27693	0.32214							0.16634	0.32214									2	0.271887	0.0735217	4
4	0.78478	0.68902							0.64084	0.68902									4	0.700915	0.0603471	4
8	0.8945	0.88434							0.91232	0.88434									8	0.893875	0.0131965	4
16		0.96346							0.95916	0.96346									16	0.962027	0.00248261	3
32		0.9775							1.039	0.9775									32	0.998	0.035507	3
64
128
K	0.448	0.3776							0.3087	0.3776									K	0.377975	0.0568706	4	s-1
	whole-cell
7.5
dt5[s]	hA1a-4								hA1a-1	hA1a-4	hA1a-6
1	0								0.23197	0.015041	0.18323								1	0.10756	0.117378	4
2	0.37989								0.84757	0.37892	0.61792								2	0.556075	0.224514	4
4	0.81143								0.94238	0.72257	0.89694								4	0.84333	0.0971005	4
8	0.86232								0.98626	0.93561	0.96398								8	0.937043	0.0539552	4
16	0.97279								0.97747	0.85193	0.97774								16	0.944983	0.0620766	4
32	0.95862									0.91313	0.96806								32	0.946603	0.0293705	3
64
128
K	0.5657								1.776	0.5441	0.7986								K	0.9211	0.581463	4	s-1
	whole-cell
7.6
dt5[s]	hA1a-4								hA1a-4	hA1a-6
1	0								0.069403	0.084206									1	0.051203	0.0449566	3
2	0.46845								0.63478	0.61421									2	0.57248	0.0906778	3
4	0.83762								0.91652	0.94717									4	0.900437	0.0565182	3
8	0.95132								0.98579	0.96931									8	0.968807	0.0172405	3
16	0.99057								1.2392	0.92763									16	1.05247	0.164749	3
32	0.96423								1.0259	1.0256									32	1.00524	0.0355189	3
64
128
K	0.6557								0.7167	0.9284									K	0.766933	0.143122	3	s-1

## Sheet: Fig. 1F
Titel:	rates used for the ASIC1a model
The values for "SSD" are shown in sheet "Fig. 1D"
The values for "recovery from desensitization" are shown in sheet "Fig. 1E"
"opening", tau values in ms								"current decay", tau values in ms								"deactivation", tau in ms
pH	6.8	6.6	6.4	6.2	6			pH	6.8	6.6	6.4	6.2	6		pH	6.0 / 7.4
	62.63	20.02	9.977	4.166	1.922				636.1	446.5	550.3	310.7	474.7			2.035
	70.66	11.02	8.552	5.292	2.227				703.7	492.4	430	412.7	420.9			1.868
	62.6	9.865	8.727	3.271	4.293					442.2	419	452.5	292.7			3.036
		17.2	10.18	1.974	2.919					615.6	468.1	317.5	397.2			2.58
		19.74	6.262	2.012	1.497					438.5	527.9	312.3	625.1			4.696
		24.64	8.625	4.216	1.597					404.4	417.7	261	573.4			3.183
		16.43	9.041	6.422	2.63					516.1	423.6	218.2	507.6			3.128
		23.87	12.24	3.907	2.523					317.5	370.5	367.3	394.3			3.428
		23.18	8.571	4.023	4.809						410.2	303.8	449.7			4.073
		16.05	7.862	2.781	2.031						491.1	352.9	181.6			3.793
		17.57	6.071	2.464	1.559						557.5	328	322.2			2.677
		14.49	10.91	2.723	1.896							350.7	360.9
		17.56	8.367	2.103	1.85							357.5	277.8
			7.461	2.645	2.32							288.2	342.8
			8.807	2.498	2.026							298.3	396.8
			10.48	2.208	2.205							352.5	356.4
				1.808	3.317							318.2
				2.233	2.738							328
				3.055	1.482							361.3
				5.042	3.181
				4.511	3.031
				2.742	1.291
				3.166	3.251
				3.284	1.778
				3.586
				3.907
				3.658
				3.228
				3.526
				3.211
				3.373
				3.265
				3.608
				4.201
				3.033
				2.654
tau (ms)								tau (ms)							tau (ms)
mean	65.2967	17.8181	8.88331	3.32767	2.43221			mean	669.9	459.15	460.536	331.137	398.381		mean	3.13609
SD	4.64481	4.53285	1.61749	0.998341	0.888307			SD	47.8004	86.818	62.8378	51.6911	111.866		SD	0.847384
n	3	13	16	36	24			n	2	8	11	19	16		n	11
rate (ms-1)								rate (ms-1)							rate (ms-1)
mean	0.0153147	0.0561228	0.112571	0.300511	0.411149			mean	0.00149276	0.00217794	0.00217138	0.0030199	0.00251016		mean	0.318868
SD	0.0010894	0.0142774	0.020497	0.090157	0.150163			SD	0.000106515	0.000411813	0.000296274	0.000471412	0.000704856		SD	0.0861595

## Sheet: Fig. 2AC-left
Titel:	Activation pH dependence
pH dependence of activation
	normalized current amplitudes, of on experiment/cell per column
pH							hA1a-CHO-E1	hA1a-CHO-E2	hA1a-CHO-E3	hA1a-CHO-E4			pH	mean	SD	n
7	0.0363635	0.083007	0.00429491	0.0116613	-0.00219391	0.00227004	0.0230751		0.00313422				7	0.0202015	0.0284211	8
6.8	0.0795678	0.175591	0.00410629	0.0419649	0.0229848	0.00454008	0.0127559	0.0313445	0.0102232	0.0140637			6.8	0.0397143	0.0528788	10
6.6	0.581914	0.469066	0.465998	0.435733	0.39638	0.375391	0.321287	0.45419	0.303836	0.44233			6.6	0.424612	0.0804349	10
6.4	0.774616	0.722003		0.687565	0.686822	0.616813	0.50781	0.737183	0.845036	0.602401			6.4	0.686694	0.100366	9
6.2	0.908641	0.916189	0.872535	0.770664	0.818433	0.733071	0.835456	0.654363	0.87181	0.697284			6.2	0.807845	0.0905559	10
6	1.02433	1.07972	0.885815	0.931003	0.936286	0.896994	0.948557	0.917303	0.983396	0.899919			6	0.950333	0.061937	10
5	1	1	1	1	1	1	1	1	1	1			5	1	0	10

## Sheet: Fig. 2AC-right
Titel:	pH dependence of steady-state desensitization (SSD)
						from 25.10.2011							pH	mean	SD	n
	hA1a-CHO-E1	hA1a-CHO-E2	hA1a-CHO-E3	hA1a-CHO-E4	hA1a-CHO-E5	hA1a-CHO-E1	hA1a-CHO-E2	hA1a-CHO-E3	hA1a-CHO-E4	hA1a-CHO-E5
7.6	1.04907	1.0877	1.31716	1.06332		0.949322	1.09625	1.12917	1.07175	1.12922			7.6	1.09922	0.0977644	9
7.4	1	1	1	1		1	1	1	1	1			7.4	1	0	9
7.3	1.01884	1.02794	1.04772	1.03574		1.00275	1.06071	1.00316	1.00796	1.00284			7.3	1.02307	0.0214284	9
7.2	0.820892	0.823874	0.941746	0.851293		0.885785	0.885954	0.78664	0.851473	0.719848			7.2	0.840834	0.0639552	9
7.1	0.301748	0.29808	0.443925	0.346631		0.694443	0.53636	0.545004	0.507713	0.485609			7.1	0.462168	0.13004	9
7	0.00267558	0.00251915	0.00528192	0.0347362		0.0339394	0.0563927	0.112213	0.0217162	0.196338			7	0.0517569	0.0643069	9
6.9	0.00155409	0.00145073	0.000908247	0.0160877									6.9	0.00500018	0.00739708	4

## Sheet: Fig. 2B
The data in Fig. 2B are the same as described in Figs. 1D, 1E and 1F.

## Sheet: Fig. 3
	Data shown under
3A	Fig. 2AC-left
3B	Fig. 2AC-right
3C	Fig. 1F
3D	Figs. 1D and 1D

## Sheet: Fig. 4C
Titel:	Rise time - normalized current correlation for pH ramp 7.4-6.0
pH ramp fall time	normalized current amplitude
(s)
11.53	0
10.03	0.0252157
7.516	0.0247059
6.338	0.733813
9.593	0.429231
6.03036	0.1632
9.43854	0.0668
4.36	0.408451
8.11	0.237089
13.06	0.0109155
18.03	0.00690821
4.53	0.113569
7.85	0.0516729
10.78	0.035316

## Sheet: Fig. 4D
Titel:	Rise time - normalized current correlation for pH ramp 7.4-6.6
pH ramp fall time	normalized current amplitude
(s)
6.714	0.23434
9.1	0
8.94	0
9.51	0.0112463
5.6	-0.00661721
17.12	0.0409496
4.66	0.154066
8.56	0.00109558
4.18	0.308633
7.22	0.11223
19.48	-0.0207914
4.33	0.606061
9.59	0.118182
4.13	0.140887
6.77	0.018867
4.65	0.0691579
6.39	0.0823276
11.11	-0.00375
6.96	0.0343115
15.26	-0.0169526

## Sheet: Fig. 4E
Titel:	normalized current for pH ramp 7.4-6.6 and 7.4-6.0
	Iint_N-6.6	Islow_N-6.6	Iint_N-6.0	Islow_N-6.0
				0
				0.0252157
			0.0247059
			0.733813
			0.429231
			0.1632
			0.0668
			0.408451
			0.237089
				0.0109155
				0.00690821
			0.113569
			0.0516729
				0.035316
	0.23434
	0
	0
	0.0112463
	-0.00661721
		0.0409496
	0.154066
	0.00109558
	0.308633
	0.11223
		-0.0207914
	0.606061
	0.118182
	0.140887
	0.018867
	0.0691579
	0.0823276
		-0.00375
	0.0343115
		-0.0169526

[truncated: 21 more sheets: Fig. 4F, Fig. 4G, Fig. 4H , Fig. 4I, Fig. 6D, Fig. 6E, Fig. 6F, Fig. 6G, Fig. 6H, Fig. 6I, Fig. 6J, Fig. 7A, Fig. 7B, Fig. 7C, Fig. 7D, Fig. 7E, Fig. 7F, Fig. 8B, Fig. 8C, Fig. 8D …]
